# Supplementary material for: Deciphering early human pancreas development at the single-cell level
Source: PubMed Central journal article supplement (PMC10475098; doi:10.1038/s41467-023-40893-8), 2023-09-02
Supplement: 41467_2023_40893_MOESM3_ESM.pdf [file 41467_2023_40893_MOESM3_ESM.pdf]

## **Description of Additional Supplementary Files**

**Supplementary Data 1.** Human embryo sample information

**Supplementary Data 2.** Differentially expressed genes of pancreatic epithelial cells, related to Fig. 1.

**Supplementary Data 3.** Differentially expressed genes of epithelial cells in PCW 4 and 5, related to Fig. 2.

**Supplementary Data 4.** Differentially accessible peaks of pancreatic epithelial cells, related to Fig. 3.

**Supplementary Data 5.** Differentially expressed genes of pancreatic endocrine cells, related to Fig. 6.

**Supplementary Data 6.** Differentially expressed regulons of pancreatic endocrine cells, related to Fig. 6.
